# Supplementary material for: Sadness and Loneliness in Adolescents with Physical, Sensory or Health Problems in Low/Middle-Income Countries
Source: MDPI journal article supplement (doi:10.3390/children10060996), 2023-06-01
Supplement: s1 [file s1]

Table S1. Descriptive analysis of participants according to self-perceived physical, sensory or health problems at school, relationships and comparisons by sex.

| Variables        | Overall = 33301 |      | Men = 16198 |      | Women = 17103 |       | x <sup>2</sup> | df | p      |
|------------------|-----------------|------|-------------|------|---------------|-------|----------------|----|--------|
| See_Problems     | n               | %    | n           | %    | n             | %     |                |    |        |
| Yes              | 5176            | 15.5 | 2095        | 12.9 | 3081          | 18.0* | 163.6          | 1  | <0.001 |
| No               | 28125           | 84.5 | 14103       | 87.1 | 14022         | 82.0* |                |    |        |
| Hear_Problems    | Overall = 33126 |      | Men = 16083 |      | Women = 17043 |       | 0.2            | 1  | 0.642  |
| Yes              | 1644            | 5.0  | 789         | 4.9  | 855           | 5.0   |                |    |        |
| No               | 31482           | 95.0 | 15294       | 95.1 | 16188         | 95.0  |                |    |        |
| Walk_Problems    | Overall = 32502 |      | Men = 15802 |      | Women = 16700 |       | 18.1           | 1  | <0.001 |
| Yes              | 2301            | 7.1  | 1217        | 7.7  | 1084          | 6.5*  |                |    |        |
| No               | 30201           | 92.9 | 14585       | 92.3 | 15616         | 93.5* |                |    |        |
| Grasp_Problems   | Overall = 32503 |      | Men = 15825 |      | Women = 16678 |       | 10.2           | 1  | 0.001  |
| Yes              | 2464            | 7.6  | 1276        | 8.1  | 1188          | 7.1*  |                |    |        |
| No               | 30039           | 92.4 | 14549       | 91.9 | 15490         | 92.9* |                |    |        |
| Sick_Cannot_Play | Overall = 32691 |      | Men = 15890 |      | Women = 16801 |       | 9.1            | 1  | <0.001 |
| Yes              | 4851            | 14.8 | 2261        | 14.2 | 2590          | 15.4* |                |    |        |
| No               | 27840           | 85.2 | 13629       | 85.8 | 14211         | 84.6* |                |    |        |
| Some_Problem     | Overall = 31873 |      | Men = 15533 |      | Women = 16340 |       | 60.4           | 1  | <0.001 |
| Yes              | 10485           | 32.9 | 4784        | 30.8 | 5701          | 34.9* |                |    |        |
| No               | 21388           | 67.1 | 10749       | 69.2 | 10639         | 65.1* |                |    |        |

n: Participants; %: Percentage; x<sup>2</sup>: Pearson's Chi-square; df: Degree freedom; p: p-value from Chi-square test; \*: Significant differences between sex ratios.

Table S2. Descriptive analysis: Feelings.

| Variables      | Overall = 33301 |      | Men = 16198 |      | Women = 17103 |       | x <sup>2</sup> | df | p     |
|----------------|-----------------|------|-------------|------|---------------|-------|----------------|----|-------|
|                | n               | %    | n           | %    | n             | %     |                |    |       |
| Satisfied_Life | Overall = 33163 |      | Men = 16098 |      | Women = 17065 |       | 15.0           | 2  | 0.001 |
| Not at all     | 3115            | 9.4  | 1577        | 9.8  | 19248         | 9.0*  |                |    |       |
| Satisfied      | 6959            | 21.0 | 3253        | 20.2 | 4963          | 21.7* |                |    |       |
| Completely     | 23089           | 69.6 | 11268       | 70.0 | 5100          | 69.3  |                |    |       |
| Fun than me    | Overall = 32285 |      | Men = 15685 |      | Women = 16600 |       | 31.6           | 2  | 0.001 |
| Never          | 20366           | 63.1 | 9982        | 63.6 | 10384         | 62.6* |                |    |       |
| Occasionally   | 5733            | 17.8 | 2886        | 18.4 | 2847          | 17.2* |                |    |       |
| Often          | 6186            | 19.2 | 2817        | 18.0 | 3369          | 20.3* |                |    |       |
| Lonely         | Overall = 32224 |      | Men = 15634 |      | Women = 16590 |       | 223.4          | 2  | 0.001 |
| Never          | 20921           | 64.9 | 10774       | 68.9 | 10147         | 61.2* |                |    |       |
| Occasionally   | 5509            | 17.1 | 2457        | 15.7 | 3052          | 18.4* |                |    |       |
| Often          | 5594            | 18.0 | 2403        | 15.4 | 3391          | 20.4* |                |    |       |
| Sad            | Overall = 32184 |      | Men = 15607 |      | Women = 16577 |       | 594.7          | 2  | 0.001 |
| Never          | 19484           | 60.5 | 10485       | 67.2 | 8999          | 54.3* |                |    |       |
| Occasionally   | 7062            | 21.9 | 3014        | 19.3 | 4048          | 24.4* |                |    |       |
| Often          | 5638            | 17.5 | 2108        | 13.5 | 3530          | 21.3* |                |    |       |
| Cry            | Overall = 32276 |      | Men = 15661 |      | Women = 16615 |       | 1070.7         | 2  | 0.001 |
| Never          | 25969           | 80.5 | 13756       | 87.8 | 12213         | 73.5* |                |    |       |
| Occasionally   | 3200            | 9.9  | 1050        | 6.7  | 2150          | 12.9* |                |    |       |
| Often          | 3107            | 9.6  | 855         | 5.5  | 2252          | 13.6* |                |    |       |

n: Participants; %: Percentage; x<sup>2</sup>: Pearson's Chi-square; df: Degree freedom; p: p-value from Chi-square test; \*: Significant differences between sex ratios.

Table S3: Feelings and sight.

| Often you fell     | I can see what is written on the board without difficulty. |      |       |       | x <sup>2</sup> | df | p      |
|--------------------|------------------------------------------------------------|------|-------|-------|----------------|----|--------|
|                    | No                                                         |      | Yes   |       |                |    |        |
| Satisfied life     | n                                                          | (%)  | n     | (%)   |                |    |        |
| Not at all         | 553                                                        | 10.9 | 2373  | 8.7*  | 77.8           | 2  | <0.001 |
| Satisfied          | 1223                                                       | 24.2 | 5543  | 20.3* |                |    |        |
| Completely         | 3276                                                       | 64.8 | 19373 | 71.0* |                |    |        |
| Fun than me        |                                                            |      |       |       |                |    |        |
| Never              | 2825                                                       | 57.1 | 17276 | 64.3* | 126.6          | 2  | <0.001 |
| Occasionally       | 909                                                        | 18.4 | 4744  | 17.7  |                |    |        |
| Often              | 1213                                                       | 24.5 | 4855  | 18.1* |                |    |        |
| Lonely             |                                                            |      |       |       |                |    |        |
| Never              | 2819                                                       | 57.2 | 17842 | 66.5* | 217.9          | 2  | <0.001 |
| Occasionally       | 886                                                        | 18.0 | 4540  | 16.9  |                |    |        |
| Often              | 1227                                                       | 24.9 | 4456  | 16.6* |                |    |        |
| Sad                |                                                            |      |       |       |                |    |        |
| Never              | 2572                                                       | 52.1 | 16659 | 62.2* | 233.7          | 2  | <0.001 |
| Occasionally       | 1172                                                       | 23.7 | 5803  | 21.7* |                |    |        |
| Often              | 1197                                                       | 24.2 | 4334  | 16.2* |                |    |        |
| Cry without reason |                                                            |      |       |       |                |    |        |
| Never              | 3482                                                       | 70.9 | 22160 | 82.3* | 355.8          | 2  | <0.001 |
| Occasionally       | 684                                                        | 13.9 | 2472  | 9.2*  |                |    |        |
| Often              | 743                                                        | 15.1 | 2279  | 8.5*  |                |    |        |

n: Participants; %: Percentage; x<sup>2</sup>: Pearson's Chi-square; dl: Degree freedom; p: p-value from Chi-square test; \*: Significant differences between see problems status ratio.

Table S4. Feelings and hearing.

| Often you fell     | I can hear the teacher's voice clearly when he or she is giving a lesson. |      |       |       | x <sup>2</sup> | df | p      |
|--------------------|---------------------------------------------------------------------------|------|-------|-------|----------------|----|--------|
|                    | No                                                                        |      | Yes   |       |                |    |        |
| Satisfied_life     | n                                                                         | (%)  | n     | (%)   |                |    |        |
| Not at all         | 324                                                                       | 20.7 | 2539  | 8.3*  | 355.8          | 2  | <0.001 |
| Satisfied          | 419                                                                       | 26.8 | 6311  | 20.6* |                |    |        |
| Completely         | 823                                                                       | 52.6 | 21725 | 71.1* |                |    |        |
| Fun than me        |                                                                           |      |       |       |                |    |        |
| Never              | 766                                                                       | 51.6 | 19307 | 63.8* | 129.1          | 2  | <0.001 |
| Occasionally       | 276                                                                       | 18.6 | 5353  | 17.7  |                |    |        |
| Often              | 443                                                                       | 29.8 | 5605  | 18.5* |                |    |        |
| Lonely             |                                                                           |      |       |       |                |    |        |
| Never              | 751                                                                       | 50.4 | 19891 | 65.8* | 184.1          | 2  | <0.001 |
| Occasionally       | 294                                                                       | 19.7 | 5111  | 16.9* |                |    |        |
| Often              | 445                                                                       | 29.9 | 5225  | 17.3* |                |    |        |
| Sad                |                                                                           |      |       |       |                |    |        |
| Never              | 692                                                                       | 46.9 | 18510 | 61.3* | 177.3          | 2  | <0.001 |
| Occasionally       | 351                                                                       | 23.8 | 6600  | 21.9* |                |    |        |
| Often              | 434                                                                       | 29.4 | 5093  | 16.9* |                |    |        |
| Cry without reason |                                                                           |      |       |       |                |    |        |
| Never              | 998                                                                       | 66.8 | 24603 | 81.3* | 202.3          | 2  | <0.001 |
| Occasionally       | 227                                                                       | 15.2 | 2904  | 9.6*  |                |    |        |
| Often              | 269                                                                       | 18.0 | 2743  | 9.1*  |                |    |        |

n: Participants; %: Percentage; x<sup>2</sup>: Pearson's Chi-square; dl: Degree freedom; p: p-value from Chi-square test; \*: Significant differences between see problems status ratio.

Table S5. Feelings and walking.

| Often you fell     | I have a physical disability that makes it difficult for me to walk or use stairs. |      |       |       |                |    |        |  |
|--------------------|------------------------------------------------------------------------------------|------|-------|-------|----------------|----|--------|--|
|                    | Yes                                                                                |      | No    |       |                |    |        |  |
| Satisfied_life     | n                                                                                  | (%)  | n     | (%)   | x <sup>2</sup> | df | p      |  |
| Not at all         | 458                                                                                | 21.5 | 2330  | 7.9*  | 491.3          | 2  | <0.001 |  |
| Satisfied          | 490                                                                                | 23   | 6118  | 20.8* |                |    |        |  |
| Completely         | 1181                                                                               | 55.5 | 20993 | 71.3* |                |    |        |  |
| Fun than me        |                                                                                    |      |       |       |                |    |        |  |
| Never              | 1116                                                                               | 54.7 | 18723 | 63.8* | 112.1          | 2  | <0.001 |  |
| Occasionally       | 357                                                                                | 17.5 | 5227  | 17.8  |                |    |        |  |
| Often              | 566                                                                                | 27.8 | 5408  | 18.4* |                |    |        |  |
| Lonely             |                                                                                    |      |       |       |                |    |        |  |
| Never              | 1137                                                                               | 55.8 | 19248 | 65.7* | 101.6          | 2  | <0.001 |  |
| Occasionally       | 383                                                                                | 18.8 | 4963  | 16.9* |                |    |        |  |
| Often              | 519                                                                                | 25.5 | 5100  | 17.4* |                |    |        |  |
| Sad                |                                                                                    |      |       |       |                |    |        |  |
| Never              | 1054                                                                               | 51.9 | 17919 | 61.1* | 86.9           | 2  | <0.001 |  |
| Occasionally       | 484                                                                                | 23.9 | 6417  | 21.9* |                |    |        |  |
| Often              | 491                                                                                | 24.2 | 4970  | 17.0* |                |    |        |  |
| Cry without reason |                                                                                    |      |       |       |                |    |        |  |
| Never              | 1416                                                                               | 68.9 | 23909 | 81.5* | 218.8          | 2  | <0.001 |  |
| Occasionally       | 279                                                                                | 13.6 | 2827  | 9.6*  |                |    |        |  |
| Often              | 360                                                                                | 17.5 | 2614  | 8.9*  |                |    |        |  |

n: Participants; %: Percentage; x<sup>2</sup>: Pearson's Chi-square; dl: Degree freedom; p: p-value from Chi-square test; \*: Significant differences between see problems status ratio.

Table S6. Feelings and grasping.

| Often you fell     | I have a physical disability that makes it difficult for me to grasp small objects like a pencil or scissors. |      |       |       | x <sup>2</sup> | df | p      |
|--------------------|---------------------------------------------------------------------------------------------------------------|------|-------|-------|----------------|----|--------|
|                    | Yes                                                                                                           |      | No    |       |                |    |        |
| Satisfied_life     | n                                                                                                             | (%)  | n     | (%)   |                |    |        |
| Not at all         | 471                                                                                                           | 20.8 | 2302  | 7.8*  | 459.0          | 2  | <0.001 |
| Satisfied          | 488                                                                                                           | 21.6 | 6109  | 20.8  |                |    |        |
| Completely         | 1304                                                                                                          | 57.6 | 20920 | 71.3* |                |    |        |
| Fun than me        |                                                                                                               |      |       |       |                |    |        |
| Never              | 1144                                                                                                          | 52.3 | 18730 | 64.0* | 157.4          | 2  | <0.001 |
| Occasionally       | 419                                                                                                           | 19.2 | 5167  | 17.7  |                |    |        |
| Often              | 624                                                                                                           | 28.5 | 5369  | 18.3* |                |    |        |
| Lonely             |                                                                                                               |      |       |       |                |    |        |
| Never              | 1183                                                                                                          | 53.7 | 19251 | 65.9* | 143.1          | 2  | <0.001 |
| Occasionally       | 458                                                                                                           | 20.8 | 4901  | 16.8* |                |    |        |
| Often              | 562                                                                                                           | 25.5 | 5058  | 17.3* |                |    |        |
| Sad                |                                                                                                               |      |       |       |                |    |        |
| Never              | 1126                                                                                                          | 51.6 | 17893 | 61.2* | 112.3          | 2  | <0.001 |
| Occasionally       | 507                                                                                                           | 23.2 | 6403  | 21.9  |                |    |        |
| Often              | 548                                                                                                           | 25.1 | 4924  | 16.9* |                |    |        |
| Cry without reason |                                                                                                               |      |       |       |                |    |        |
| Never              | 1485                                                                                                          | 67.3 | 23870 | 81.7* | 299.2          | 2  | <0.001 |
| Occasionally       | 313                                                                                                           | 14.2 | 2794  | 9.6*  |                |    |        |
| Often              | 407                                                                                                           | 18.5 | 2569  | 8.8*  |                |    |        |

n: Participants; %: Percentage; x<sup>2</sup>: Pearson's Chi-square; dl: Degree freedom; p: p-value from Chi-square test; \*: Significant differences between see problems status ratio.

Table S7. Feelings and getting sick.

| Often you fell     | I often get so sick I cannot play, work or go to school. |      |       |       | x <sup>2</sup> | df | p      |
|--------------------|----------------------------------------------------------|------|-------|-------|----------------|----|--------|
|                    | Yes                                                      |      | No    |       |                |    |        |
| Satisfied_life     | n                                                        | (%)  | n     | (%)   |                |    |        |
| Not at all         | 795                                                      | 17.6 | 2015  | 7.4*  | 593.6          | 2  | <0.001 |
| Satisfied          | 1099                                                     | 24.3 | 5543  | 20.4* |                |    |        |
| Completely         | 2628                                                     | 58.1 | 19677 | 72.2* |                |    |        |
| Fun than me        |                                                          |      |       |       |                |    |        |
| Never              | 2340                                                     | 52.7 | 17603 | 64.9* | 355.1          | 2  | <0.001 |
| Occasionally       | 817                                                      | 18.4 | 4794  | 17.7  |                |    |        |
| Often              | 1286                                                     | 28.9 | 4738  | 17.5* |                |    |        |
| Lonely             |                                                          |      |       |       |                |    |        |
| Never              | 2292                                                     | 51.7 | 18225 | 67.3* | 517.5          | 2  | <0.001 |
| Occasionally       | 856                                                      | 19.3 | 4519  | 16.7* |                |    |        |
| Often              | 1288                                                     | 29.0 | 4348  | 16.0* |                |    |        |
| Sad                |                                                          |      |       |       |                |    |        |
| Never              | 2026                                                     | 45.8 | 17073 | 63.0* | 654.5          | 2  | <0.001 |
| Occasionally       | 1082                                                     | 24.4 | 5839  | 21.6* |                |    |        |
| Often              | 1320                                                     | 29.8 | 4174  | 15.4* |                |    |        |
| Cry without reason |                                                          |      |       |       |                |    |        |
| Never              | 2968                                                     | 66.7 | 22468 | 82.9* | 711.0          | 2  | <0.001 |
| Occasionally       | 643                                                      | 14.5 | 2472  | 9.1*  |                |    |        |
| Often              | 837                                                      | 18.8 | 2155  | 7.9*  |                |    |        |

n: Participants; %: Percentage; x<sup>2</sup>: Pearson's Chi-square; df: Degree freedom; p: p-value from Chi-square test;

\*: Significant differences between see problems status ratio.

Table S8. Feelings and some problems.

| Often you fell     | Some problems ... |      |        |       | x <sup>2</sup> | df | p      |
|--------------------|-------------------|------|--------|-------|----------------|----|--------|
|                    | Yes               |      | No     |       |                |    |        |
| Satisfied_life     | n                 | (%)  | n      | (%)   |                |    |        |
| Not at all         | 1383              | 13.8 | 1303   | 6.2*  | 632.9          | 2  | <0.001 |
| Satisfied          | 2371              | 23.6 | 4107   | 19.6* |                |    |        |
| Completely         | 6281              | 62.6 | 15571  | 74.2* |                |    |        |
| Fun than me        |                   |      |        |       |                |    |        |
| Never              | 5594              | 56.1 | 13986  | 66.7* | 482.8          | 2  | <0.001 |
| Occasionally       | 1812              | 18.2 | 3677   | 17.5  |                |    |        |
| Often              | 2568              | 25.7 | 3290   | 15.7* |                |    |        |
| Lonely             |                   |      |        |       |                |    |        |
| Never              | 5581              | 56   | 14534  | 69.4* | 671.2          | 2  | <0.001 |
| Occasionally       | 1854              | 18.6 | 3414   | 16.3* |                |    |        |
| Often              | 2525              | 25.4 | 2988.0 | 14.3* |                |    |        |
| Sad                |                   |      |        |       |                |    |        |
| Never              | 5077              | 45.8 | 13650  | 65.2* | 762.7          | 2  | <0.001 |
| Occasionally       | 2363              | 24.4 | 4421   | 21.1* |                |    |        |
| Often              | 2505              | 29.8 | 2854   | 13.6* |                |    |        |
| Cry without reason |                   |      |        |       |                |    |        |
| Never              | 7106              | 71.3 | 17883  | 85.3* | 926.6          | 2  | <0.001 |
| Occasionally       | 1327              | 13.3 | 1733   | 8.3*  |                |    |        |
| Often              | 1540              | 15.4 | 1348   | 6.4*  |                |    |        |

n: Participants; %: Percentage; x<sup>2</sup>: Pearson's Chi-square; df: Degree freedom; p: p-value from Chi-square test;

\*: Significant differences between see problems status ratio.
